# Supplementary material
Source: publisher figshare collection journal article supplement (https://acs.figshare.com/ndownloader/files/20806827)
Supplement: Supplementary file 1 [file 20806827]

## Interference of Solvatochromic Twist in Amyloid Nanostructure for Light-Driven Biocatalysis

*Giyeong Son<sup>†</sup>, Jinhyun Kim<sup>†</sup>, and Chan Beum Park<sup>\*</sup>*

Department of Materials Science and Engineering, Korea Advanced Institute of Science and Technology (KAIST), 335 Science Road, Daejeon 305-701, Republic of Korea

<sup>\*</sup>E-mail: parkcb@kaist.ac.kr

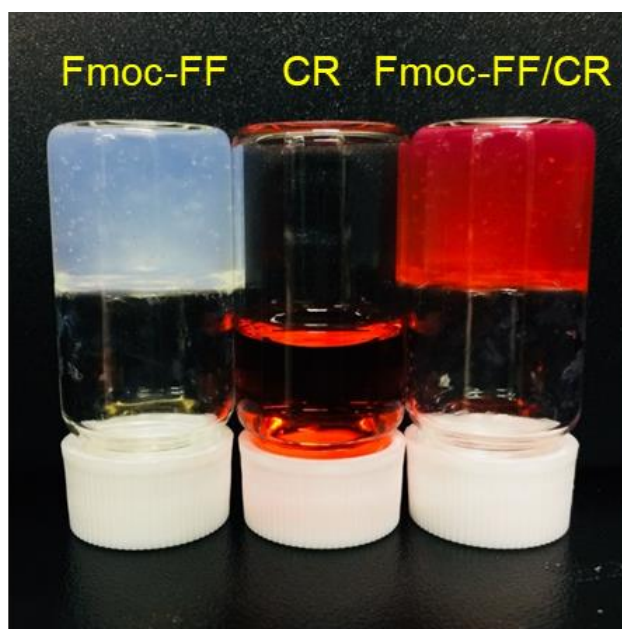

**Figure S1.** Photographs of CR solution, Fmoc-FF, and Fmoc-FF/CR hydrogels. The Fmoc-FF hydrogel was white, while the Fmoc-FF/CR hydrogel was red. The concentrations of Fmoc-FF and CR were 10 mg ml<sup>-1</sup> and 200  $\mu$ M, respectively.

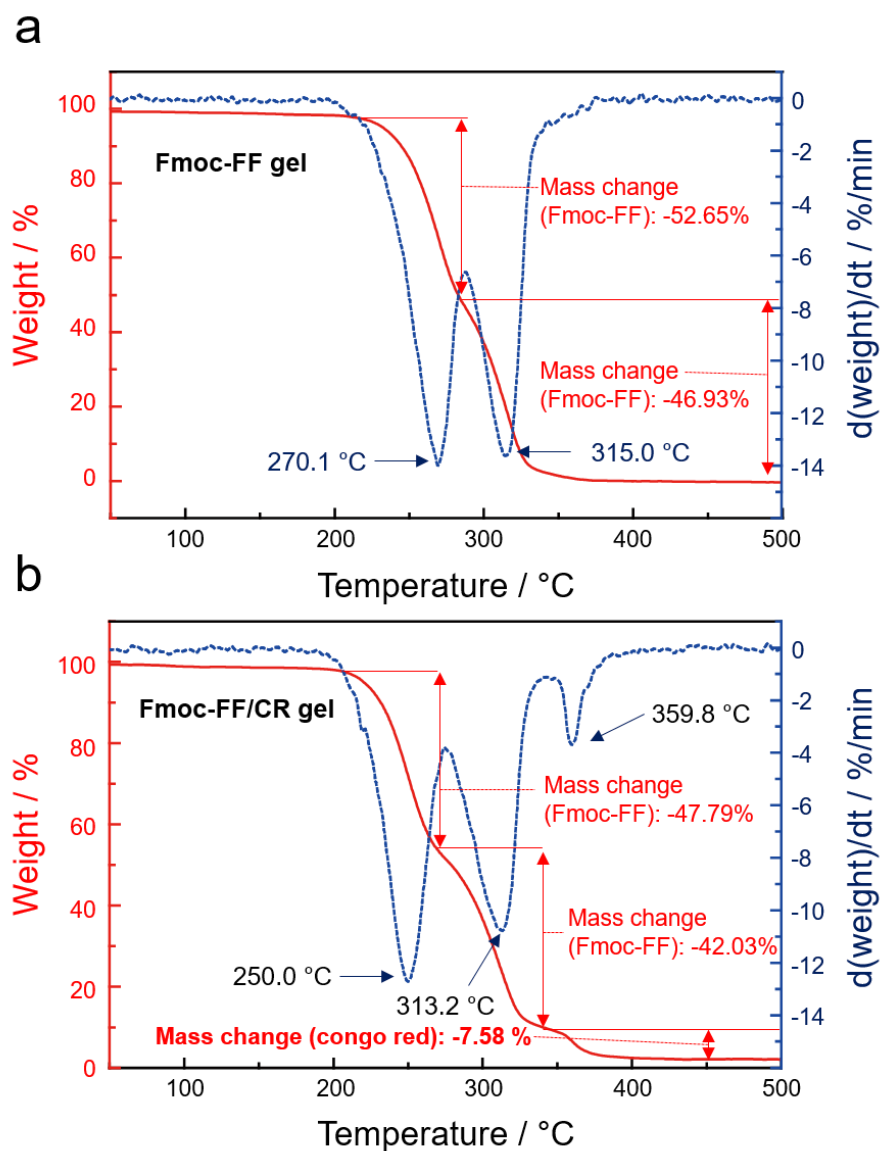

**Figure S2.** Thermogravimetric analysis of (a) Fmoc-FF and (b) Fmoc-FF/CR hydrogels. These two hydrogels were lyophilized before the analysis. The weight loss of the pristine Fmoc-FF hydrogel occurred from 200 to 350 °C. This thermal degradation range of the Fmoc-FF was similar in the Fmoc-FF/CR hydrogel; the CR dyes were thermally decomposed after 350 °C.

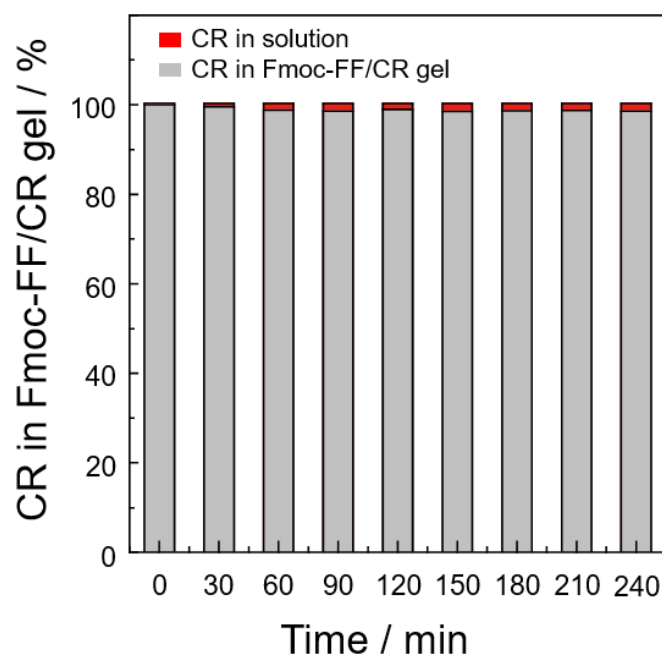

**Figure S3.** Time profile of the relative amount of CR in the supernatant and Fmoc-FF/CR hydrogel. Note that we injected deionized water above the Fmoc-FF/CR hydrogel and obtained the absorbance spectra of the supernatant to measure the concentration of free CR. Then, we estimated a relative amount of the CR in the Fmoc-FF/CR hydrogel by subtracting the amount of free CR in the solution from the initial amount of CR in Fmoc-FF/CR hydrogel.

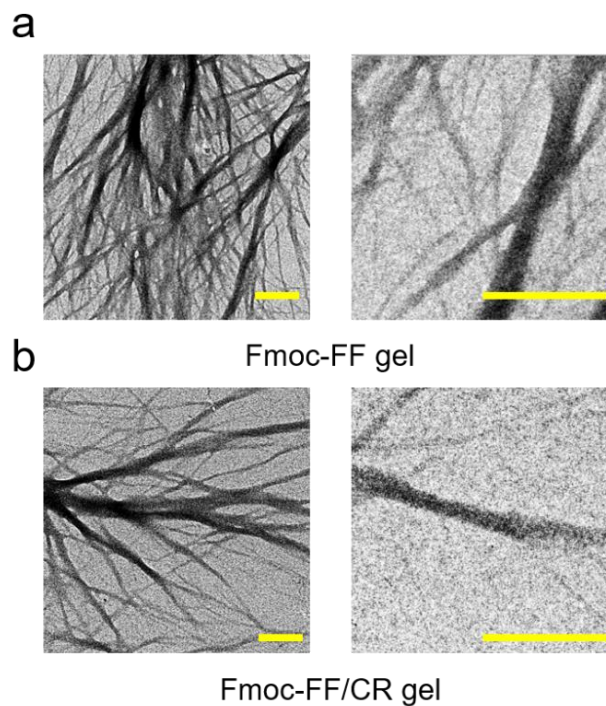

**Figure S4.** Transmission electron microscopy images of (a) Fmoc-FF and (b) Fmoc-FF/CR hydrogels. Scale bar: 500 nm.

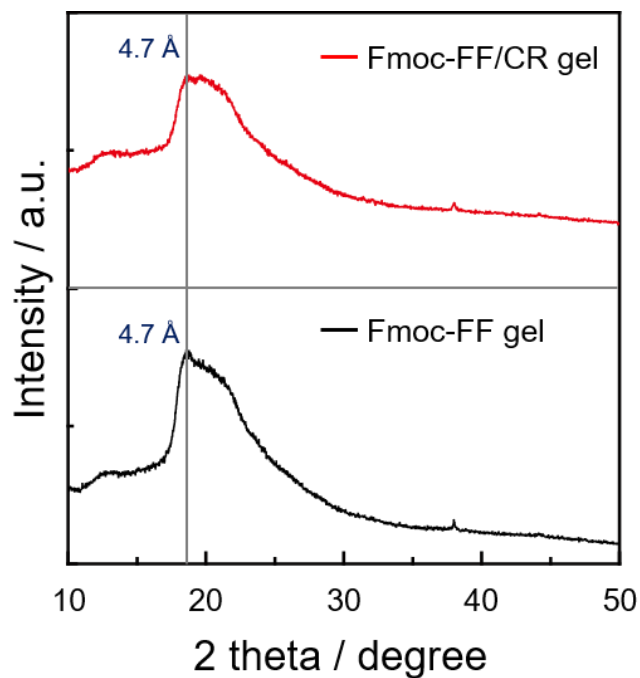

**Figure S5.** X-ray diffraction patterns of Fmoc-FF and Fmoc-FF/CR hydrogels. Cu K $\alpha$ 1 radiation wavelength: 1.5406 Å. The characteristic peak at 18.65° (d: 4.7 Å) stemmed from the interstrand distance of Fmoc-FF nanofibers (*Biomacromolecules* **2017**, 18, 3551-3556).

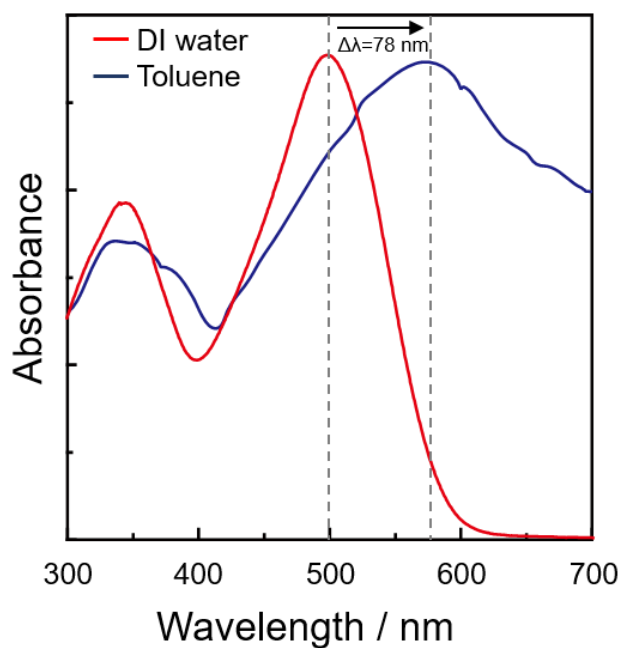

**Figure S6.** Absorbance spectra of the CR in deionized water and toluene to investigate the solvatochromic effect of free CR. The concentration of CR was 100  $\mu\text{M}$ .

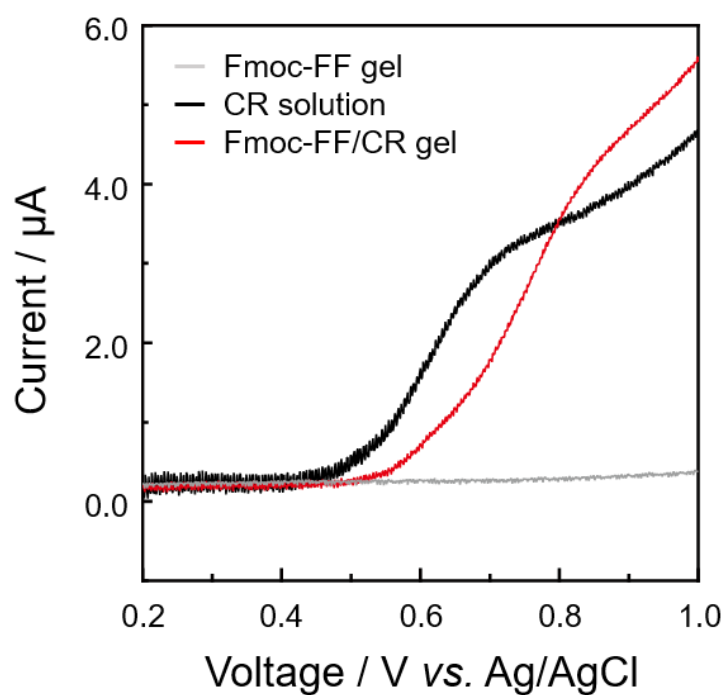

**Figure S7.** Linear sweep voltammograms of CR solution, Fmoc-FF and Fmoc-FF/CR hydrogels. Scan rate: 50  $\text{mV s}^{-1}$ . The working electrodes of Fmoc-FF and Fmoc-FF/CR hydrogels were Fmoc-FF-coated ITO and Fmoc-FF/CR-coated ITO, respectively.

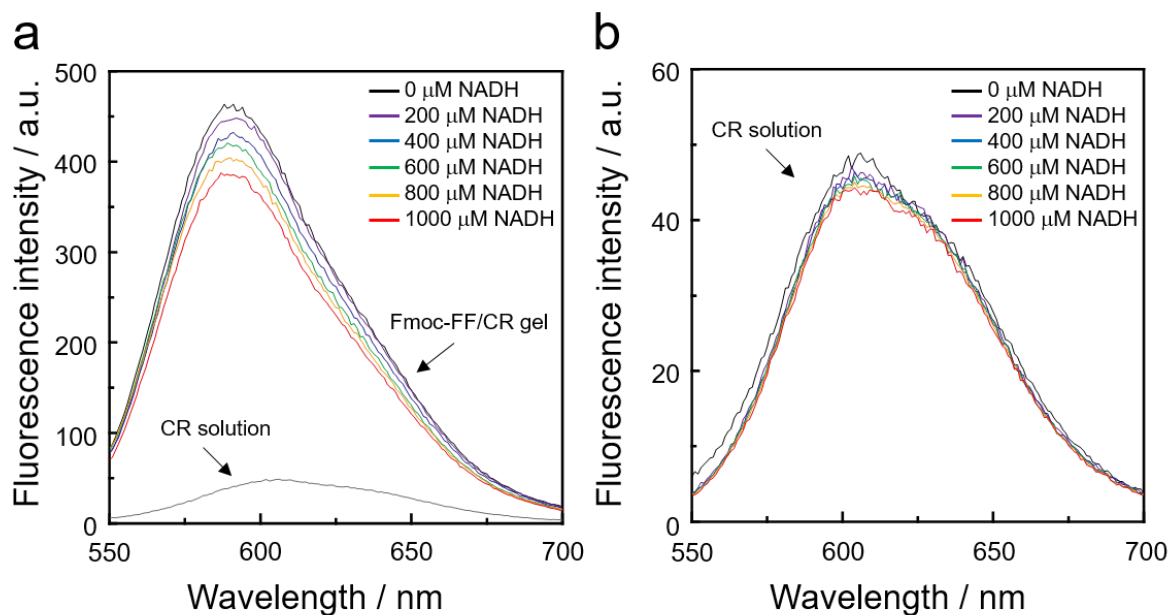

**Figure S8.** Fluorescence spectra of (a) Fmoc-FF/CR hydrogel and (b) CR solution at different concentrations of NADH. Excitation wavelength: 500 nm.

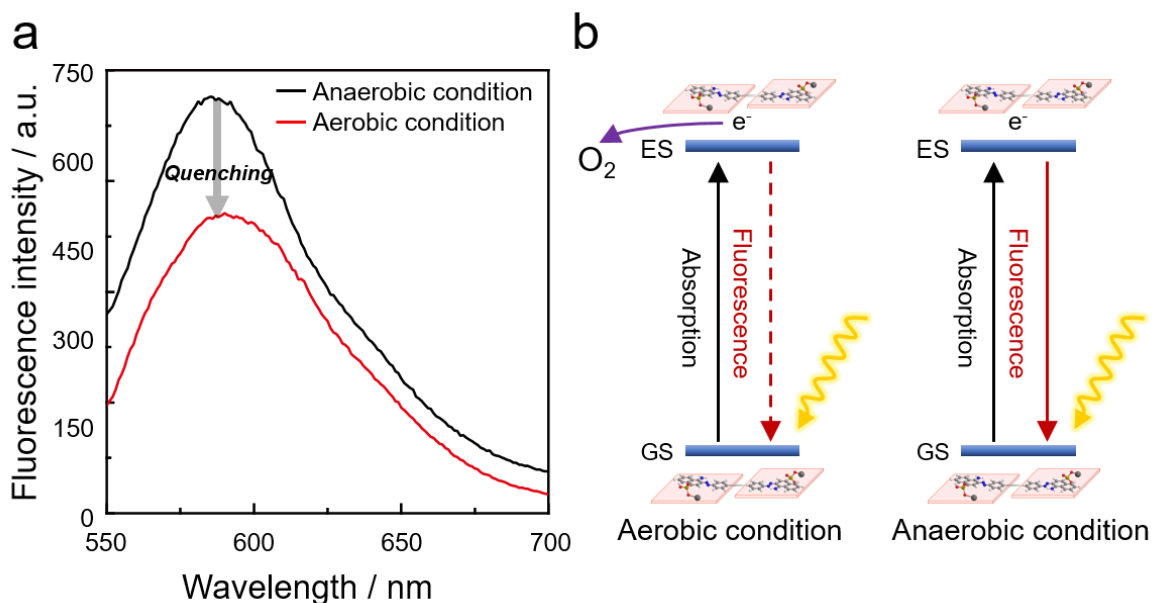

**Figure S9.** (a) Fluorescence spectra of Fmoc-FF/CR hydrogel under anaerobic or aerobic conditions. Excitation wavelength: 500 nm. The anaerobic solution was prepared by purging with Ar gas. (b) Illustration of an oxidative quenching of Fmoc-FF/CR hydrogel by  $O_2$  molecules under light irradiation.

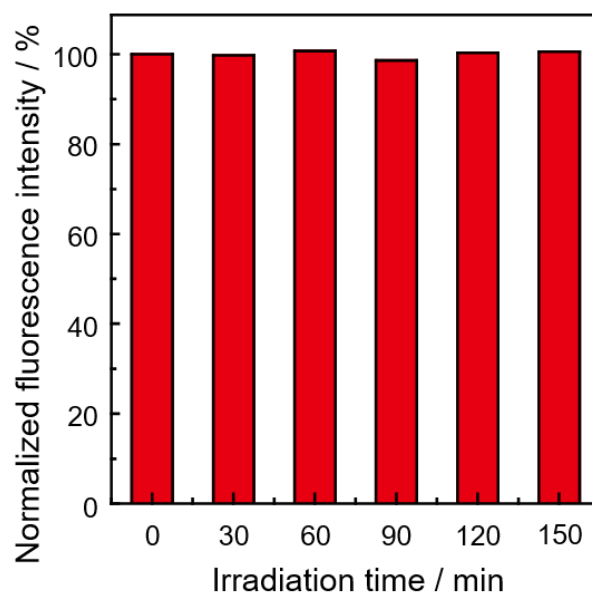

**Figure S10.** Time profile of normalized fluorescence intensity ( $I/I_0$ ) of Fmoc-FF/CR hydrogel during photobiocatalytic oxidation. Excitation wavelength: 500 nm. Emission wavelength: 600 nm. Reaction condition: 10 mg ml<sup>-1</sup> Fmoc-FF, 200 μM CR, 5 U ml<sup>-1</sup> ScADH, 2 mM NADH, and 10 mM ethanol in a sodium phosphate buffer (25 mM, pH 8.8).

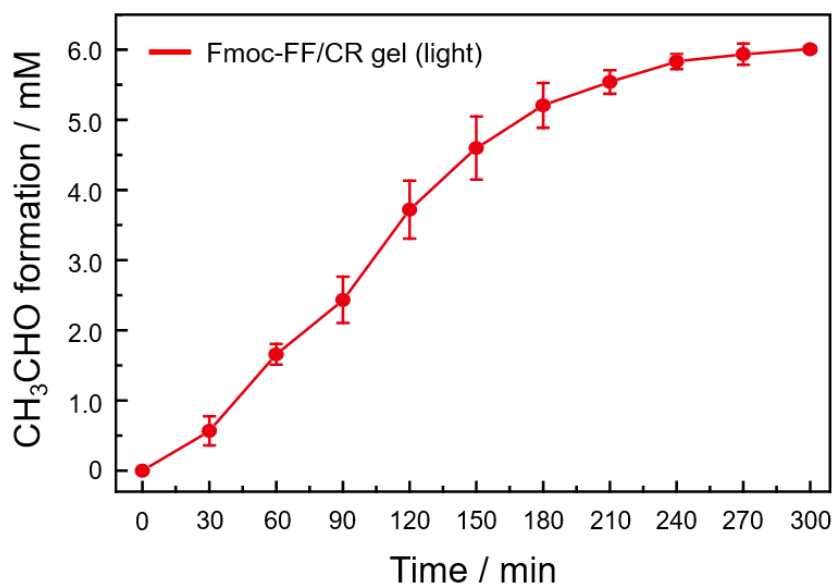

**Figure S11.** Time profile of photoenzymatic production by Fmoc-FF/CR hydrogel with ScADH. Reaction condition: 10 mg ml<sup>-1</sup> Fmoc-FF, 200 μM CR, 5 U ml<sup>-1</sup> ScADH, 2 mM NADH, and 10 mM ethanol in a sodium phosphate buffer (25 mM, pH 8.8).
